# Supplementary material
Source: HighWire-hosted journal article supplement (https://bmjopenquality.bmj.com/highwire/filestream/135987/field_highwire_adjunct_files/0/ds4235.docx)
Supplement: ds4235.docx [file ds4235.docx]

TABLE 1 – BASELINE DATA

| DATE | TYPE OF CLINC | DOCTOR | TOTAL No. of patients  *(incl. DNA and missed)* | PSORIASIS PATIENTS | PEST DONE  In last 1 year | PEST >3  That were  MISSED | SPECIFIC  JOINT  INQUIRY | DNA | PT NOT  INTERVIEWED | PATIENT  REFUSED |
| --- | --- | --- | --- | --- | --- | --- | --- | --- | --- | --- |
| 23RD  SEPT | PSORIASIS | A | 7 | 5 | 0 | 0 | 1 | 0 | 1 |  |
|  | PSORIASIS | B | 7 | 4 | 0 | 0 | 0 | 2 | 0 |  |
|  | GENERAL | C | 11 | 0 | 0 | 0 | 0 | 4 | 1 |  |
| 26TH SEPT | GENERAL | A | 9 | 1 | 0 | 0 | 0 | 2 | 0 |  |
|  | GENERAL | D | 12 | 1 | 0 | 0 | 0 | 3 | 1 | 1 |
|  | GENERAL | E | 12 | 1 | 0 | 1 | 0 | 3 | 1 |  |
| 30TH SEPT | PSORIASIS | A | 7 | 3 | 0 | 1 | 0 | 3 | 0 |  |
|  | PSORIASIS | B | 7 | 3 | 0 | 0 | 1 | 1 | 1 |  |
|  | GENERAL | C | 12 | 2 | 0 | 1 | 0 | 1 | 1 |  |
| 7TH OCT | GENERAL | C | 12 | 1 | 0 | 0 | 0 | 3 | 2 |  |

TABLE 2 – CYCLE 1 DATA

| **DATE** | **TYPE OF CLINC** | **DOCTOR** | **TOTAL patients**  ***(incl. DNA and not intv)*** | **PSORIASIS PATIENTS** | **PREV.**  **PA** | **ELIGIB-LE**  **PTS** | **ELIGIBLE PEST**  **DONE TODAY** | **PEST DONE**  **LAST 1 YR** | **PEST**  **PICKED**  **UP**  **>3** | **SPECIFIC**  **JOINT**  **INQUIRY**  **IN LAST 1 YR** | **DNA** | **PTS NOT**  **INTERVD** | **REFERRED** |
| --- | --- | --- | --- | --- | --- | --- | --- | --- | --- | --- | --- | --- | --- |
| 7TH OCT | PSORIASIS | A | 8 | 3 | 0 | 3 | 3 | 0 | 0 | 0 | 1 | 1 |  |
|  | PSORIASIS | B | 8 | 4 | 1 | 3 | 3 | 1 | **2** | 1 | 3 | 1 | **2** |
| 14TH OCT | PSORIASIS | A | 8 | 5 | 2 | 3 | 3 | 0 | n/a  (known  PA) | 3 | 3 |  | n/a  (known  PA) |
| TOTAL PATIENTS |  |  | 24 | 12 | 3 | 9 | 9 | 1 | 2 | 4 | 7 | 2 | **2** |

TABLE 3 – CYCLE 2 DATA

| **DATE** | **TYPE OF CLINC** | **DOCTOR** | **TOTAL patients**  ***(incl. DNA and not intv)*** | **PSORIASIS**  **PTS** | **PREV**  **PA** | **ELIGIBLE**  **PTS** | **ELIGIBLE**  **PEST**  **DONE**  **TODAY** | **PEST DONE**  **LAST 1 YR** | **PEST**  **PICKED UP**  **>3** | **SPECIFIC**  **JOINT**  **INQUIRY**  **IN LAST 1 YR** | **DNA** | **PT NOT**  **INTERVD** | **REFERRED** |
| --- | --- | --- | --- | --- | --- | --- | --- | --- | --- | --- | --- | --- | --- |
|  | PSORIASIS | B | 7 | 4 | 1 | 3 | 3 | 0 | n/a  (known  PA) | 1 | 2 | 1 |  |
| 14TH OCT | GENERAL | F | 13 | 1 | 0 | 1 | 0 | 0 | 0 | 0 |  |  |  |
|  | GENERAL | C | 12 | 1 | 0 | 1 | 0 | 0 | 0 | 0 |  |  |  |
| 16TH OCT | GENERAL | G | 4 | 1 | 0 | 1 | 0 | 0 | 0 | 0 |  |  |  |
| TOTAL PATIENTS |  |  | 36 | 7 | 1 | 6 | 3 | 0 | 0 | 1 | 2 | 1 | 0 |

TABLE 4 – FINAL CYCLE DATA

| **DATE** | **TYPE OF CLINIC** | **DOCTOR** | **TOTAL patients**  ***(incl. DNA and not intv)*** | **PSORIASIS PTS** | **PREV**  **PA** | **ELIGIBLE**  **PATS** | **ELIGIBLE PEST**  **DONE**  **TODAY** | **PEST DONE**  **LAST 1 YR** | **PICKED UP**  **PEST >3** | **SPECIFIC**  **JOINT**  **INQUIRY**  **IN LAST 1 YR** | **DNA** | **REFERRED** |
| --- | --- | --- | --- | --- | --- | --- | --- | --- | --- | --- | --- | --- |
| 17TH OCT | GENERAL | C | 12 | 2 | 1 | 1 | 1 | 0 | n/a  (known  PA) | 0 | 3 | n/a (known PA) |
|  | GENERAL | E | 12 | 1 | 0 | 1 | 1 | 0 | 1 | 0 |  | **1** |
| 21ST OCT | PSORIASIS | A | 8 | 4 | 1 | 3 | 3 | 0 | 0 | 1 | 4 |  |
|  | GENERAL | F | 13 | 1 | 1 | 0 | 0 | 0 | 0 | 0 | 2 |  |
| 22ND OCT | GENERAL | E | 11 | 1 | 0 | 1 | 1 | 0 | 1 | 0 | 0 | **1** |
| 22ND OCT | GENERAL | G | ? | 1 | 0 | 1 | 1 | 0 | 0 | 0 |  |  |
| 23rd OCT | GENERAL | H | 9 | 1 | 0 | 1 | 1 | 0 | 0 | 0 |  |  |
| 27TH OCT | GENERAL | E | 10 | 1 | 0 | 1 | 1 | 0 | 0 | 0 |  |  |
| 28th OCT | PSORIASIS | H | 3 | 3 | 0 | 3 | 3 | 0 | 0 | 0 | 1 |  |
| 29th OCT  PM | GENERAL | I | 14 | 2 | 0 | 2 | 2 | 0 | 0 | 0 |  |  |
| 29th OCT  AM | GENERAL | E | 12 | 1 | 0 | 1 | 1 | 0 | 1 | 0 | 6 | 1 |
| TOTAL  PATIENTs |  |  | 104 | 18 | 3 | 15 | 15 | 0 | 3 | 1 |  | 3 |
